# Supplementary material
Source: publisher figshare collection journal article supplement (https://gsajournals.figshare.com/ndownloader/files/11099609)
Supplement: Supplementary file 1 [file 11099609]

## Sheet: DownGeneInfo
Gene	CuffDiff WT (vs.adv1) Mean FPKM	CuffDiff adv1 Mean FPKM	Cuffdiff adv1 log2 fold change	CuffDiff WT (vs.pp1) Mean FPKM	CuffDiff pp1 Mean FPKM	Cuffdiff pp1 log2 fold change	DOWN in Δadv1 vs WT	DOWN in Δpp1 vs. WT	PP1 DAP Dist. to ATG	ADV1 DAP1 Dist. to ATG	ADV1 DAP2 Dist. to ATG	ADV1 ChIP <2000bp	ADV1 DAP-ChIP consensus <2000bp	FungiDB Annotation	Gene Name	Mutant Fusion Frequency	Circos Group	pfam domains	SignalP	TMHMM	LG	Genomic Location Start	Length (aa)	Ascomycota Orthologs	GO terms	additional notes
NCU00321	72.6704	3.07359	-4.56337	73.888	12.8918	-2.51889	1	1	1566	NA	1261	1	1	hypothetical protein	NA	WT	hypothetical	none	N	0	3	3157964	836	none	none	BLASTp: Flocculation protein
NCU00832	4.59676	0.40856	-3.492	4.67379	0.28422	-4.03952	1	1	1428	NA	1067	1	1	hypothetical protein	NA	WT	hypothetical with TM	none	N	2	1	7024555	402	AN6802	F: organic cyclic compound binding, F: hetercyclic compound binding
NCU00836	2.98495	0.418466	-2.83452	3.03515	0.270575	-3.48767	1	1	776	NA	533	0	0	glycosylhydrolase family 61-7 protein	NA	WT	plant cell wall degradation	Glycosyl hydrolase family 61 and Fungal cellulose binding domain (CMB_1)	Y	0	1	7005196	326	none	F: cellulose binding, P: carbohydrate metabolic process, C: extracellular region, F:hydrolase activity, hydrolyzing O-glycosyl coumpounds	Likely PMO (Free 2013), blast2GO: FDR<0.05 for cellulose binding
NCU00995	217.437	2.588	-6.39262	221.072	47.1871	-2.22805	1	1	NA	NA	1139	1	1	hypothetical protein	NA	WT	hypothetical with SP	none	Y	0	1	6456247	139	none	none
NCU01098	10.598	1.07091	-3.30689	10.776	1.05319	-3.35498	1	1	NA	765	780	1	1	hypothetical protein	NA	WT	hypothetical	Ankyrin repeats (3 copies) and Ankyrin repeats (many copies)	N	0	5	2909865	1430	none	F: protein binding	Ankyrin Repeats mediate protein-protein interactions, No fungal orthologs!
NCU01289	74.8388	2.72041	-4.78189	76.0947	12.3386	-2.62462	1	1	NA	NA	1047	1	1	hypothetical protein	NA	WT	hypothetical with SP+TM	none	Y	1	5	3535323	598	none	none
NCU01382	43.2814	1.09396	-5.30611	44.0069	1.68342	-4.70826	1	1	NA	250	275	1	1	hypothetical protein	NA	WT	fungal cell wall remodling	two DUF3433's	N	8	5	3842095	1217	AN2391	none
NCU01463	7.16599	0.871813	-3.03908	7.28617	1.19657	-2.60625	1	1	NA	NA	NA	1	0	hypothetical protein	NA	WT	hypothetical	none	N	0	5	4657310	425	none	P: pointed-end actin filament capping, F: tropomyosin binding
NCU01509	108.701	10.4296	-3.38161	110.522	19.9536	-2.46961	1	1	NA	NA	421	1	1	hypothetical protein	NA	noKO	adehsion	none	N	0	2	3233926	701	Chromosome-binding protein in N. discreta, cation channell or mucin-like-protein in Aspergillus,	none	BLASTp: GPI-anchored protein, Actin regulatory complex PAN1, Mucin-17, Flocculation protein Flo11
NCU01697	84.9402	5.52181	-3.94324	86.3669	3.34449	-4.69062	1	1	NA	2318	2272	0	0	hypothetical protein	NA	WT	fusion	none	N	4	2	2692636	347	AN4338	none
NCU02046	38.9339	4.33103	-3.16825	39.5885	5.27195	-2.90867	1	1	523	2512	2560	0	0	hypothetical protein	NA	WT	hypothetical	none	N	0	1	1570281	508	AN4922	none
NCU02086	52.5041	6.57435	-2.99751	53.3856	8.08452	-2.72322	1	1	NA	NA	NA	0	0	hypothetical protein	NA	KOhet	DNA	none	N	0	1	1383040	562	RPB1 in S. cerevisiae	none	BLASTp: RNApolymerase II subunit.
NCU02246	24.3869	2.20061	-3.47013	24.7961	2.07971	-3.57566	1	1	NA	1656	1594	1	1	hypothetical protein	NA	WT	adehsion	none	Y	0	7	3196352	774	Chitinase in N. discreta + hypotheticals in a couple ascomycetes	none	BLASTp:Mucin, serine-rich adhesin for platelets (GspB), endochitinase, flocculation protein Flo11, GPI-anchored protein
NCU02613	17.3242	0.898173	-4.26965	17.6143	0.482974	-5.18866	1	1	2138	1962	1956	1	1	hypothetical protein	NA	WT	hypothetical with SP	none	Y	0	1	2916447	510	AN3818	none
NCU02811	219.227	18.7044	-3.55098	222.904	47.7991	-2.22137	1	1	NA	1572	287	1	1	hyphal anastamosis-8 protein	ham-8	0	communication	none	N	4	1	9041203	526	AN4264	none
NCU02843	3.71528	0.64728	-2.52101	3.77742	0.390238	-3.27497	1	1	NA	NA	NA	0	0	hypothetical protein	NA	KOhet	hypothetical	none	N	0	1	8935176	132	none	none
NCU02988	133.351	3.14033	-5.40817	135.592	24.6639	-2.4588	1	1	NA	688	1535	1	1	hypothetical protein	NA	WT	metabolism	Methyltransferase (Methyltransf 11)	N	0	1	8501413	1072	AN10964 and YALI0C11825g in Y. lipolytica	F: methyltranserase activity, P: metabolic process	SAM dependent methyltransferase, FungiDB shows orthology with verprolin-like proteins which are involved in actin dynamics and polarized growth,
NCU03013	148.279	12.8478	-3.52872	150.762	22.3951	-2.75102	1	1	2832	NA	1818	1	1	anchored cell wall protein 10	NA	WT	redox	Copper/Zinc superoxide dismutase (SODC) (SodCu)	Y	0	1	8440393	248	SOD4/SOD5/SOD6 in C. albicans	F: metal ion binding, P: superoxide metabolic process, P: oxide-reduction process	anti-oxidant, converts reactive oxygen to less-reactive oxygen, Oxygen metabolism: turns a superoxide into normal oxygen or hydrogenperoxide
NCU03035	190.341	9.97646	-4.25392	193.535	26.3733	-2.87545	1	1	3000	2387	758	1	1	hypothetical protein	NA	noKO	hypothetical	none	N	0	1	8362243	347	none	none
NCU03132	81.3331	3.35226	-4.60064	82.6973	8.85135	-3.22387	1	1	NA	NA	1690	1	1	hypothetical protein	NA	WT	adehsion	none	N	1	1	4671805	731	N. discreta: "Nuclear receptor coregulator SMRT/SMRTER, contains Myb-like domains", "conserved proline-rich protein" in a few ascomycetes , and in A. fumigatus: "Putative methyltransferase; member of a biosynthetic gene cluster"	none	BLASTp: Flocculation protein Flo11, Mucin-like, Cell wall hydroxyproline-rich glycoprotein, TonB, Sec16
NCU03247	13.8931	0.348334	-5.31776	14.1261	0.156713	-6.4941	1	1	NA	NA	NA	0	0	hypothetical protein	NA	WT	stress response	Taurine catabolism dioxygenase TauD, Tfd	N	0	1	5049047	385	AN4198 and AN6453	P: oxidation-reduction process, F: oxioreductase	Breaks down taurine as a source of sulphur for the cell, TauD is expressed in E.coli only during sulphate starvation to use Taurine as a sulfur source, associated with adaptation to hostile environments, Taurine is normally part of osmoregulation
NCU03294	2.83652	0.116403	-4.60693	2.88407	0.181096	-3.99328	1	1	446	NA	2215	0	0	hypothetical protein	NA	WT	hypothetical with SP	none	Y	0	1	5215274	178	none	none
NCU03494	1.86916	0.00972374	-7.58666	1.90039	0.0454139	-5.38701	1	1	731	457	481	1	1	heterokaryon incompatibility protein	pin-c	WT	heterokaryon incompatibility	HET domain	N	0	2	487248	884	none	none
NCU03863	21.0743	1.91513	-3.45998	21.4286	1.57482	-3.76627	1	1	NA	NA	2080	1	0	hypothetical protein	NA	WT	stress response	RTA1-like protein	N	6	6	1926625	456	RTA1 and RSB1 in S. cerevisiae	P: response to stress, C: integral component of the membrane	RTA1 is a fungal TM protein that confers resistance to an unknown toxic chemical in molasses!
NCU03960	122.617	8.8808	-3.78732	124.671	21.8073	-2.51524	1	1	1623	NA	1657	1	1	Hyphal anastamosis-12 protein	ham-12	0.66	communication	none	N	1	6	2245319	156	AN7532	none
NCU04058	24.7964	4.50965	-2.45904	25.2126	4.25884	-2.56562	1	1	NA	NA	NA	0	0	hypothetical protein	NA	WT	DNA	bZIP Transcription Factor	N	0	6	2011680	306	AN4324	P: regulation of transcription, DNA-templated, F: sequence-specific DNA binding, F: transcription factor activity, sequence-specific DNA binding, C: transcription factor complex, P: regulation of transcription
NCU04122	409.107	3.89721	-6.71389	415.961	18.5693	-4.48546	1	1	1811	NA	681	0	0	tricarboxylic acid-18	NA	WT	metabolism	DUF2990 and DUF3455	Y	0	5	4917314	276	AN0736	none	gluconeogenesis and citric acid cycle (metabolism, might not have have anything to do with toxins)
NCU04488	31.8448	3.56437	-3.15934	32.379	5.18641	-2.64225	1	1	NA	NA	NA	0	0	hypothetical protein	NA	WT	heterokaryon incompatibility	Interferon-induced 6-16 family	N	2	4	3198491	212	none	C: integral component of membrane	upregulated in response to mycovirus infection (FC=2.1-2.8) (Choudhary et al, 2007)
NCU04496	62.2115	2.21048	-4.81475	63.2571	2.25614	-4.8093	1	1	527	NA	480	1	1	hypothetical protein	NA	WT	redox	Plastocyanin-like domain (Cu binding plant protein domain)	Y	0	4	3252138	221	AN4815	F: electron carrier activity	blas2go annotation: extracellular serin-rich protein
NCU04996	57.473	4.20714	-3.77197	58.4366	2.74272	-4.41319	1	1	NA	1575	159	1	1	hypothetical protein	NA	WT	metabolism	Acetyltransferase (GNAT) domain	N	0	6	4148887	297	none	F: N-acetyl-transferase activity, P: acyl-carrier-protein biosynthetic process	Could add an acety group to a histone, N-terminus of proteins, or choline (to make the neurotransmitter acetylcholine, which has been found in shiitakes),
NCU04997	2.91565	0.494316	-2.56031	2.96468	0.199092	-3.89637	1	1	744	NA	2352	0		xylanase	NA	WT	plant cell wall degradation	Glycosyl hydrolase family 10 and Fungal cellulose binding domain	Y	0	6	4144717	431	AN7401	F: hydrolase activity, hydrolysing O-glycosyl compounds, P: carbohydrate metabolic process, C: extracellular region, F: cellulose binding	Likely Xylanase (Free 2013), blast2GO: FDR<0.05 for cellulose binding
NCU05126	6.70094	0.210733	-4.99088	6.81339	0.659087	-3.36983	1	1	NA	NA	NA	1	0	hypothetical protein	NA	WT	metabolism	UbiA prenyltransferase family	N	4	6	3662628	365	none	F: prenyltransferase activity, C: integral component of the membrane	synthesis of CoenzymeQ (part of the electron transport chain)
NCU05188	0.882247	0.119871	-2.8797	0.897091	0.170881	-2.39226	1	1	NA	NA	NA	1	0	flavin dinucleotide oxygenase-1	NA	WT	metabolism	FAD binding domain and Phenol hydroxylase, C-terminal dimerisation domain	N	0	4	5816743	753	none	P: oxidation-reduction process, F: monooxygenase activity	Toxin break-down: oxidizes substrate, usually prior to removing it from the cell
NCU05629	6.73833	0.185257	-5.18479	6.85143	0.0391861	-7.44992	1	1	1118	NA	NA	0	0	hypothetical protein	NA	WT	hypothetical	none	N	0	6	1272198	206	none	none
NCU05712	47.9815	0.0296918	-10.6582	48.785	0.107466	-8.82642	1	1	NA	NA	261	1	1	hypothetical protein	NA	WT	heterokaryon incompatibility	none	N	0	3	599368	257	none	none
NCU05834	4.80354	0.0408754	-6.87672	4.8842	0.0520149	-6.55305	1	1	583	NA	NA	0	0	hypothetical protein	NA	WT	hypothetical with SP	none	Y	0	7	3987604	317	none	none
NCU05835	128.375	2.71272	-5.56448	130.527	21.116	-2.62794	1	1	NA	732	763	1	1	hypothetical protein	NA	WT	metabolism	none	Y	1	7	3989366	606	none	C: integral component of membrane	SecretedProtease_Acid-Protease, blast2go: aspartic endopeptidase
NCU05915	58.6201	0.307414	-7.57507	59.6026	4.03207	-3.88578	1	1	NA	NA	NA	1	0	hypothetical protein	NA	WT	hypothetical with SP+TM	none	Y	1	6	3483083	367	none	none
NCU05948	0.915654	0.0573234	-3.99761	0.930977	0.0352752	-4.72202	1	1	NA	NA	NA	0	0	hypothetical protein	NA	WT	hypothetical	?none	N	0	6	3353034	110	AN1756	none
NCU06034	67.7129	6.9684	-3.28053	68.8487	4.28865	-4.00483	1	1	NA	NA	523	1	1	hypothetical protein	NA	WT	hypothetical with TM	MARVEL membrane-associated domain	N	4	7	2021301	150	AN8278	C: membrane
NCU06081	24.991	3.61295	-2.79016	25.4096	2.49778	-3.34666	1	1	NA	NA	1559	0	0	hypothetical protein	NA	KOhet	hypothetical	none	N	0	7	1873481	385	none	none
NCU06140	43.0588	1.06109	-5.34269	43.7811	1.13927	-5.26412	1	1	537	NA	662	1	1	hypothetical protein	NA	WT	DNA	Myb-like DNA-binding domain	N	0	7	1664902	345	none	F: DNA binding
NCU06294	7.57699	1.7618	-2.10458	7.70397	0.835757	-3.20445	1	1	NA	NA	NA	1	0	hypothetical protein	NA	noKO	hypothetical	DUF3638 and DUF3645	N	0	4	3004977	3163	AN7637	none
NCU06334	28.2349	1.11827	-4.65815	28.708	3.06773	-3.22621	1	1	1306	NA	NA	1	0	hypothetical protein	NA	noKO	adehsion	none	N	0	4	2876800	678	hypotheticals in a couple ascomycetes	none	BLASTp: Flocculation protein Flo11
NCU06607	10.1541	1.91498	-2.40666	10.3249	1.35457	-2.93023	1	1	1553	NA	NA	0	0	hypothetical protein	NA	WT	adehsion	none	Y	0	4	1790219	572	N. discreta: "C-type lectin", hypothetical in other ascomycetes	none	BLASTp: Cell wall protein IFF6, adhesin-like, clumping factor A, polysialoglycoprotein
NCU06912	12.2868	0.969692	-3.66343	12.4927	1.02758	-3.60376	1	1	NA	NA	NA	0	0	hypothetical protein	NA	WT	hypothetical with SP	none	Y	0	7	747459	208	none	none
NCU06989	121.02	13.5295	-3.16107	123.048	23.2379	-2.40467	1	1	NA	NA	NA	1	0	hypothetical protein	NA	noKO	development	Senescence-associated protein	N	0	4	4797546	518	AN0823	none	cell death protein in plants and animals, associated with mitochondria and microtubules
NCU07192	376.351	5.54025	-6.08598	382.664	66.0294	-2.5349	1	1	NA	NA	2957	1	0	determinant of communication 2	doc-2	0.37	communication	none	N	0	5	6282213	839	none	none
NCU07388	46.1651	9.91354	-2.21933	46.9394	2.84713	-4.04322	1	1	NA	2066	2073	1	1	hypothetical protein	NA	WT	hypothetical with SP+TM	None	Y	1	1	6269599	564	AN5149	none
NCU07392	242.046	5.4062	-5.48452	246.103	44.1788	-2.47784	1	1	NA	NA	NA	0	0	transcriptional regulatory protein pro-1	adv-1	0	communication	Fungal Zn(2)-Cys(6) binuclear cluster and fungal specific transcription factor domains	N	0	1	6094075	696	SIP4 in S. cerevisiae	C: nucleus, F: zinc ion binding, F: RNA polymerase II transcription factor activity, sequence specific DNA binding, P: regulation of transcription, DNA-templated	predicted NLS: IKMIIKRKKLS
NCU07523	64.8487	12.0819	-2.42423	65.9387	11.6382	-2.50226	1	1	NA	NA	NA	0	0	1,3-beta glucanase	NA	WT	fungal cell wall remodling	Pectate lyase superfamily protein	N	1	3	4508505	947	AN0779	P: metabolic process, F: hydrolase activity	Jie Ao et al 2016 -- isolated and characterized this protein as a member of the cell wall! Mutant has conidial separation defect.
NCU07582	11.8189	1.88852	-2.64578	12.0175	1.20047	-3.32346	1	1	1452	NA	NA	0	0	hypothetical protein	NA	WT	adehsion	none	N	1	4	144861	766	Only Neurospora and Phytophthora	none	BLASTp: Serine-rich adhesin for platelets SraP, Staph. aureus surface protein A, platelet-binding protein GspB (Streptococcus protein that binds the humanplatlete cell surface glycoprotein GP1Ba
NCU07736	0.498737	0.0341447	-3.86855	0.507111	0.0514714	-3.30046	1	1	2559	NA	NA	0	0	Pep5 homolog	NA	WT	stress response	Fungal trichothecene efflux pump (TRI12)	N	14	5	488966	592	none	none
NCU07760	18.3452	1.81892	-3.33424	18.6538	4.07579	-2.19432	1	1	NA	2723	1529	1	1	endoglucanase IV	NA	WT	plant cell wall degradation	Glycosyl hydrolase family 61 and Fungal cellulose binding domain (CMB_1)	Y	0	5	394274	369	AN3860	F: cellulose binding, C: extracellular region, F: hydrolase activity, hydrolyzing O-glycosyl compounds, P: carbohydrate metabolic process	Likely PMO (Free 2013), BROAD: "endoglucanase IV", blast2GO: FDR<0.05 for cellulose binding
NCU07798	3.47733	0.219349	-3.98668	3.53564	0.190957	-4.21065	1	1	479	NA	NA	0	0	hypothetical protein	NA	WT	hypothetical with TM	none	N	2	5	249562	558	none
NCU07802	52.9417	0.529688	-6.64312	53.8282	0.524854	-6.6803	1	1	NA	NA	NA	0	0	hypothetical protein	NA	WT	hypothetical with TM	none	N	1	5	240090	615	none	none
NCU07804	15.0363	1.69645	-3.14785	15.2884	1.02718	-3.89568	1	1	NA	NA	2877	1	0	hypothetical protein	NA	WT	hypothetical with TM	none	N	2	5	231659	388	none	none
NCU08433	15.1476	0.720067	-4.39482	15.4005	0.417208	-5.20607	1	1	NA	NA	NA	0	0	hypothetical protein	NA	WT	hypothetical with TM	none	N	7	2	4049733	304	none	none	Palma-Guerrero, 2015: no fusion defects, lysis not quantified
NCU08447	22.6984	2.37308	-3.25776	23.0783	3.00071	-2.94316	1	1	NA	NA	954	1	1	hypothetical protein	NA	WT	hypothetical with TM	none	N	7	2	3599113	455	none	none	Palma-Guerrero, 2015: no fusion defects, 4% lysis
NCU08839	1.08367	0.0168403	-6.00786	1.10185	0.0865245	-3.67068	1	1	NA	NA	NA	0	0	hypothetical protein	NA	KOhet	DNA	SAP Domain	N	0	4	5068537	597	none	C: nucleus, P: chromatin modification, F: zinc ion binding	SAP is a potential DNA/RNA binding domain in cytoplasmic or nuclear proteins
NCU09144	29.2288	4.98021	-2.55311	29.7185	5.70089	-2.3821	1	1	39	NA	NA	0	0	hypothetical protein	NA	noKO	hypothetical	none	N	0	1	5478642	307	AN0438	none
NCU09193	27.2898	2.10785	-3.69452	27.7473	3.16164	-3.1336	1	1	2950	NA	NA	0	0	hypothetical protein	NA	WT	hypothetical with SP	none	Y	0	1	5780511	414	AN4619	C: ribosome	blas2go annotation: ribosomal protein s17
NCU09244	12.4595	1.43982	-3.11329	12.6681	2.20798	-2.5204	1	1	NA	NA	NA	1	0	hypothetical protein	plp-1	WT	heterokaryon incompatibility	Patatin and NB-ARC	N	0	1	9429592	1294	AN5402	F: protein bindin, F: ADP binding, P: lipid metabolic process
NCU09245	14.2769	0.968475	-3.88182	14.516	1.24952	-3.5382	1	1	NA	NA	NA	1	0	hypothetical protein	plp-2	WT	heterokaryon incompatibility	Patatin	N	0	1	9425946	593	AN10398	P: lipid metabolic process
NCU09307	34.9407	1.17298	-4.89666	35.5264	3.62719	-3.29197	1	1	NA	NA	690	1	1	late fusion defect 1	lfd-1	reduced	fusion	none	N	1	1	4308746	1094	AN7552	none
NCU09337	33.8611	1.03939	-5.02582	34.4288	1.17838	-4.86874	1	1	NA	686	NA	1	1	plasma membrane fusion protein prm-1	prm-1	reduced	fusion	none	N	5	2	4147012	764	PRM1 in S. cerevisiae	C: mating projection tip, P: plasma membrane fusion involved in cytogamy
NCU09356	1.24469	0.0725585	-4.1005	1.26557	0.0732494	-4.11083	1	1	NA	NA	2590	0	0	hypothetical protein	NA	WT	hypothetical	none	N	0	2	4227535	554	AN7245	none
NCU09357	1.37039	0.0784596	-4.12649	1.39337	0.0349762	-5.31606	1	1	NA	NA	2736	0	0	stage V sporulation protein K	NA	WT	development	five different AAA domains (ATPase family assosciated)	N	0	2	4230923	2307	none	F: ATP binding	blast2go annotation: aaa family
NCU09428	5.73036	0.239522	-4.58039	5.8265	1.00961	-2.52883	1	1	NA	NA	1742	0	0	hypothetical protein	NA	noKO	hypothetical with SP+TM	none	Y	1	7	1173596	402	none	none
NCU09504	51.3293	3.98106	-3.68856	52.1901	7.25404	-2.84692	1	1	NA	NA	2709	1	0	hypothetical protein	NA	WT	stress response	none	N	0	3	96578	544	none	none	in A. nidulans this gene is upregulated after exposure to 100uM farnesol (FC=1.46) (Savoldi et al, 2008)
NCU09505	82.3289	1.17933	-6.12536	83.7097	8.38006	-3.32036	1	1	NA	NA	NA	1	0	hypothetical protein	NA	noKO	hypothetical	none	N	0	3	94069	448	none	none
NCU09693	238.962	30.5009	-2.96986	242.97	54.8182	-2.14805	1	1	NA	NA	939	0	0	hypothetical protein	NA	KOhet	hypothetical	none	N	0	5	815771	105	none	none	BLASTp: Serine-rich adhesion for platelets, possible GPI-anchored protein
NCU09712	10.1504	0.602213	-4.07511	10.3203	0.631856	-4.02975	1	1	NA	327	327	1	1	hypothetical protein	NA	WT	adehsion	none	N	0	7	1383089	552	only in Neurospora and Sordaria, N. discreta: "Fasciclin and related adhesion glycoproteins"	none	BLASTp: Serine-rich adhesion for platelets (SraP), cell wall protein RBR3, GPI-anchored, Endochitinase A
NCU09764	15.7793	3.50925	-2.1688	16.0447	2.25571	-2.83045	1	1	NA	1155	1168	1	1	hypothetical protein	NA	WT	plant cell wall degradation	Fungal cellulose binding domain (CMB1)	Y	0	2	4302440	405	AN7598	F: hydrolase activity, hydrolyzing O-glycosyl compouns, C: extra cellular region, P: carbohydrate metabolic process, F: cellulose binding	blast2GO parameters: FDR<0.05 for cellulose binding
NCU09848	130.761	1.47845	-6.4667	132.949	2.20138	-5.91632	1	1	NA	NA	NA	0	0	hypothetical protein	NA	WT	hypothetical with SP	DUF3455	Y	0	5	5948287	247	AN2423	none
NCU09954	5.88295	0.545426	-3.43109	5.98148	0.472303	-3.66272	1	1	NA	NA	NA	1	0	hypothetical protein	NA	KOhet	heterokaryon incompatibility	HET domain	N	0	5	6035121	885	none	none	KO also on plate #125, well B12
NCU09955	3.91884	0.250627	-3.96681	3.9844	0.332524	-3.58283	1	1	NA	2990	3000	0	0	hypothetical protein	NA	WT	hypothetical with TM	Voltage-dependent anion channel (SLAC1)	N	8	5	6,038,404	554	none	C: integral component of membrane, P: malate transmembrane transport, F: malate transmembrane transporter activity
NCU10387	15.9069	0.220401	-6.17337	16.173	1.03835	-3.96122	1	1	NA	NA	2050	0		dimethylaniline monooxygenase-1	NA	WT	metabolism	Flavin-binding monooxygenase-like	N	1	3	589843	659	none	F: N,N-dimethylanilin monooxygenase activity, F: NADP binding, F: flavin adenine dinucleotide binding, P oxidation-reduction preocess.	protein folding, catalyzes formation of disulphide bonds [MoleculeSynthesis]
NCU10610	42.8699	2.0469	-4.38845	43.5888	1.67073	-4.70541	1	1	NA	NA	1133	1	1	hypothetical protein	fig-1	WT	fusion	Ca2+ regulator and membrane fusion protein Fig1	N	4	5	701414	317	none	none	Fig1 is a yeast protein required for membrane fusion during mating
NCU11172	162.298	0.99383	-7.35143	165.021	3.92105	-5.39526	1	1	NA	400	582	1	1	hypothetical protein	NA	WT	hypothetical with TM	none	N	4	3	2861439	220	AN0964	none
NCU12021	314.111	1.75502	-7.48365	319.386	5.22682	-5.93323	1	1	NA	NA	NA	0	0	hypothetical protein	NA	noKO	hypothetical	none	N	0	7	1570143	319	none
NCU12022	314.111	1.75502	-7.48365	319.386	5.22682	-5.93323	1	1	NA	NA	NA	0	0	hypothetical protein	NA	WT	hypothetical with TM	MARVEL membrane-associated domain	N	4	7	1568960	245	none
NCU12067	21.8777	0.3085	-6.14804	22.2444	0.099081	-7.81062	1	1	NA	NA	943	0	0	hypothetical protein	NA	noKO	hypothetical with TM	none	N	3	6	149765	339	none	none
NCU12068	39.1131	0.0607484	-9.33059	39.7668	0.0990101	-8.64977	1	1	751	NA	2396	0	0	hypothetical protein	NA	WT	hypothetical with TM	none	N	4	6	151704	342	none
NCU16555	16.7716	0.928493	-4.17498	17.0526	1.64813	-3.37109	1	1	NA	NA	1831	0	0	hypothetical protein	NA	noKO	hypothetical	none	N	0	2	2398026	115	none	none	BLASTp: cell wall integrity and stress response
NCU16806	10.5351	2.17163	-2.27835	10.7109	1.40418	-2.93129	1	1	1729	NA	NA	0	0	hypothetical protein	NA	noKO	heterokaryon incompatibility	Interferon-induced 6-16 family	N	1	4	3195504	271	none		previously NCU04489, upregulated in response to mycovirus infection (FC=2.4-5.0) (Choudhary et al, 2007)
NCU16807	18.4056	0.476922	-5.27025	18.7144	0.734194	-4.67184	1	1	680	NA	NA	0	0	hypothetical protein	NA	noKO	heterokaryon incompatibility	Interferon-induced 6-16 family	N	3	4	3197375	127	none	C: integral component of membrane	previously NCU04489, upregulated in response to mycovirus infection (FC=2.4-5.0) (Choudhary et al, 2007)
NCU00340	78.1806	61.4326	-0.347806	79.4933	9.27632	-3.09921	0	1	NA	NA	NA	0	0	transcription factor steA	pp-1	0	NA	STE, zf-C2H2	N	0	3	3507722	722	Ste12(yeast)		MAK-2 dependent phosphorylation (Jonkers et al 2014)
NCU00585	30.6082	11.1893	-1.4518	31.122	6.32093	-2.29973	0	1	1498	NA	2162	1	0	phytoene synthase	NA	WT	metabolism	Squalene/phytoene synthase	N	6	1	7920916	602	no fungal orthologs		beta-carotene biosynthesis pathway
NCU00821	25.0694	23.1053	-0.117703	25.4907	4.54878	-2.48642	0	1	NA	NA	NA	0	0	sugar transporter-15	NA	WT	stress response	Sugar transporter	N	12	1	7056000	562	HGT10(C.albicans)		HGT10 is involved in glycerol uptake in response to osmotic stress
NCU01380	236.581	126.766	-0.900173	240.553	3.26608	-6.20265	0	1	1478	NA	2867	0	0	hypothetical protein	NA	WT	fungal cell wall remodling	none	Y	0	5	3836116	413	IFF8 (C.albicans)		IFF8 is a putative GPI-anchored adhesion-like protein, likely PMO
NCU01926	4.96147	2.57156	-0.948124	5.04462	0.784997	-2.68399	0	1	2006	NA	NA	0	0	hypothetical protein	NA	WT	development	F-box	N	0	1	1996875	547	no fungal orthologs		likely involved in protein-degradation
NCU02175	16.3782	4.91036	-1.73788	16.6531	3.52779	-2.23896	0	1	2108	NA	NA	0	0	phosphatidyl inositol-specific phospholipase C	NA	WT	signalling	Phosphoinositide phospholipase C (PI-PLC-X and PI-PLC-Y)	N	0	1	983862	674	PLC1(yeast)		GPCR-signaling! PLC is activated by a GPCR, PLC then cleaves a phosphate group from the membrane, triggering downstream signaling!
NCU02344	5.74608	1.58554	-1.8576	5.84269	1.1497	-2.34538	0	1	1100	NA	1299	0	0	fungal cellulose binding domain-containing protein	NA	WT	plant cell wall degradation	Glycosyl hydrolase family 61	Y	0	7	2842202	293	AN6428(A.nidulans)		Likely PMO (Free 2013)
NCU02500	149.289	256.479	0.780739	151.8	0.204798	-9.53376	0	1	1076	NA	1179	0	0	clock-controlled pheromone ccg-4	ccg-4	WT	communication	none	Y	0	1	2531832	299	MFalpha1/2 (yeast)
NCU02526	46.6361	28.051	-0.733395	47.4187	9.64669	-2.29735	0	1	211	NA	NA	0	0	hypothetical protein	NA	noKO	hypothetical	none	N	0	1	2626166	224	no fungal orthologs
NCU02558	60.9662	16.0925	-1.92162	61.9903	13.0163	-2.25172	0	1	1361	NA	NA	0	0	transcription factor-23	NA	WT	DNA	SRF-type Transcription Factor	N	0	1	2731196	626	Rfx1(yeast), MEF2(mammal)		MEF2 is a mammalian TF important for embryonic development and cell differentiation. Rfx1 is a transcriptional repressor that turns off the DNA-damasge response and is important for the DNA -replication checkpoint
NCU02875	12.4348	4.42458	-1.49077	12.6435	3.01301	-2.06912	0	1	NA	NA	NA	0	0	hypothetical protein	NA	noKO	hypothetical	none	N	0	1	8841501	323	no fungal orthologs		Deletion mutant fuses at ~9%, but phenotype does not segregate: 20 progeny = 10 hygR (WT-like) + 7 hygS (WT-like) + 3 hygS (flat, no fusion)
NCU04343	54.2006	36.0521	-0.588226	55.1099	12.3368	-2.15934	0	1	NA	NA	NA	0	0	DUF323 domain-containing protein	NA	WT	metabolism	Methyltransferase (Methyltransf 33), and two Formylglycine-generating-sulfatase domains	N	0	4	3707018	876	AN10996(A.nidulans)		SAM-dependent Histidine methyltransferase (transfers 3 methyl groups to histidine), first step in ergothioneine biosynthesis, Methylates histidine in the ergothionene synthesis pathway in mycobacteria.
NCU04720	430.082	208.245	-1.04633	437.28	98.6338	-2.1484	0	1	1243	1867	1868	1	1	nitrite reductase	NA	WT	redox	Pyridine nucleotide-disulphide oxidoreductase, BFD-like [2Fe-2S] binding domain, Nitrite/Sulfite reductase ferredoxin-like half domain, Nitrite and sulphite reductase 4Fe-4S domain, Rieske iron-sulfur protein (component of cytochrome complexes)	N	0	6	534862	1176	AN1007(A.nidulans)		involved in the redox reaction that produces disulfide bridges, and/or reduction of Nitrite/Sulfite to Ammonium/Sulfide
NCU04847	93.8787	39.8972	-1.23451	95.4571	19.8781	-2.26367	0	1	NA	1509	1527	1	1	cyclin	NA	WT	development	Cyclin_N	N	0	6	1048061	393	PCL9/PCL2(yeast)		Pcl1/Pcl2/Pcl9 regulate polarized growth, morphogenesis, and cell cycle progression in yeast
NCU05025	11.4149	13.206	0.210274	11.6063	0.455627	-4.67091	0	1	NA	NA	NA	0	0	hypothetical protein	NA	WT	hypothetical	none	N	0	6	4020776	251	no fungal orthologs		Binds to protein, DNA, or RNA… unclear which one.
NCU05681	5.28906	3.10342	-0.769154	5.37782	1.00001	-2.42701	0	1	1732	NA	NA	0	0	hypothetical protein	NA	WT	adehsion	none	N	0	3	1209876	342	hypotheticals in several ascomycetes		BLASTp: Cell wall protein RBR3 (adhesin-like protein in C. albicans), uncharacterized serine-rich protein
NCU05693	4.42873	1.38381	-1.67825	4.50301	0.80596	-2.48211	0	1	NA	2430	2391	0	0	interferon-induced GTP-binding protein Mx2	NA	noKO	development	Dynamin N & M	N	0	3	525381	750	AN1309 (A.nidulans)
NCU05798	13.687	3.69404	-1.88954	13.9165	2.3428	-2.57049	0	1	2221	NA	NA	0	0	hypothetical protein	NA	WT	hypothetical with TM	none	N	2	7	3858399	685	no fungal orthologs
NCU06326	8.12201	3.15313	-1.36505	8.25828	1.37764	-2.58364	0	1	NA	NA	NA	0	0	pectate lyase 1	NA	KOhet	plant cell wall degradation	Pectate lyase C	Y	0	4	2907628	331	no fungal orthologs
NCU07353	7.95222	3.78921	-1.06946	8.08545	0.4534	-4.15647	0	1	731	NA	60	0	0	UPF0499 protein	NA	WT	hypothetical with SP	none	Y	0	1	6269599	84	no fungal orthologs
NCU07805	4.3923	1.81038	-1.27868	4.4659	0.843189	-2.40502	0	1	NA	NA	NA	0	0	hypothetical protein	NA	WT	metabolism	Aminotransferase, class V x2	N	0	5	229594	585	no fungal orthologs		homology to molybdenum cofactor sulfurase, amino acid synthesis
NCU08169	23.8882	6.11909	-1.96491	24.2889	4.26911	-2.50829	0	1	1403	NA	NA	0	0	hypothetical protein	NA	WT	hypothetical with TM	none	N	4	7	3616556	208	AN1633(A.nidulans)
NCU08224	5.39316	2.37839	-1.18115	5.4832	0.83259	-2.71934	0	1	390	NA	NA	1	0	hypothetical protein	NA	noKO	hypothetical	none	N	0	3	4686316	182	no fungal orthologs		no KO available
NCU08739	4.0386	2.15524	-0.906004	4.10644	0.797443	-2.36443	0	1	NA	NA	NA	0	0	endothiapepsin	NA	WT	metabolism	Aspartate protease	Y	0	2	3848627	439	YPS5 (yeast)		Implicated in virulence of pathogenic fungi, potential GPI-anchor, YPS5-mCherry localizes to vacuole
NCU08847	27.7521	12.5023	-1.1504	28.2191	4.76831	-2.56512	0	1	NA	NA	NA	0	0	hypothetical protein	NA	WT	metabolism	none	N	0	5	172745	601	MNN26(C.albicans)		MNN26 is a putative alpha-1,2-mannosyltransferase
NCU09937	68.6753	35.4824	-0.952688	69.8271	14.6456	-2.25332	0	1	NA	NA	2031	0	0	cell wall glycosyl hydrolase	NA	WT	fungal cell wall remodling	Glycosyl hydrolase family 76	N	0	4	5252808	420	no fungal orthologs		alpha-1,6-mannanase (Maddi et al, 2012)
NCU10052	1.38734	1.12255	-0.305532	1.41059	0.285953	-2.30244	0	1	NA	NA	2069	0	0	hypothetical protein	NA	WT	hypothetical	none	N	0	7	1032187	744	no fungal orthologs
NCU10359	1.27028	0.68943	-0.881667	1.29156	0.251386	-2.36114	0	1	NA	NA	NA	0	0	neutral ceramidase	NA	WT	signalling	Neutral/alkaline non-lysosomal ceramidase, C&N-terminal domains	N	1	5	3109666	841	no fungal orthologs		Ceramidases cleave fatty acids from ceramide, producing sphingosine. Ceramide and sphingosines mediate cell proliferation, migration, apoptosis, adhesion, and differentiation…
NCU10537	8.15685	2.94245	-1.47099	8.29383	0.507145	-4.03157	0	1	NA	NA	NA	0	0	hypothetical protein	NA	WT	hypothetical	none	N	0	6	4151456	185	no fungal orthologs
NCU00881	158.699	18.5894	-3.09374	161.361	59.4995	-1.43934	1	0	NA	NA	1084	1	1	Hyphal anastamosis-7 protein	ham-7	0	communication	none	Y	0	1	6878944	229	AN4702
NCU00938	124.268	10.2012	-3.60664	126.349	45.9659	-1.45877	1	0	NA	546	701	1	1	hypothetical protein	idc-3	noKO	communication	none	N	4	1	6663012	304	AN3606, and IDC3 in Podospora and Epichloe		fusion mutant in other ascomycetes (i.e. Podospora), but the N. crassa KO doesn't segregate properly
NCU01789	32.4318	6.13152	-2.40309	32.9758	10.9666	-1.58829	1	0	NA	811	839	1	1	IDC1 protein	ham-5	0	communication	none	N	0	2	2433075	1686	none
NCU02020	47.6303	10.3041	-2.20866	48.4302	28.2959	-0.775315	1	0	NA	NA	NA	0	0	metalloreductase transmembrane component	NA	WT	redox	Ferric reductase, FAD-binding 8, NAD-binding 6	N	8	1	1651491	961	FRE4/FRE7 in S. cerevisiae		Oxidizes NADPH and reduces Fe, possibly involved in iron uptake for nutrition
NCU02110	108.749	11.6788	-3.21903	110.573	43.1979	-1.35597	1	0	781	NA	NA	1	0	NADPH oxidase 1	nox-1	0	communication	Ferric reductase, FAD-binding 8, NAD-binding 6	N	5	1	1253810	553	AN5457
NCU02328	18.8871	3.91261	-2.2712	19.2043	7.82379	-1.29549	1	0	NA	NA	NA	0	0	O-methyltransferase	NA	WT	DNA	Methyltransferase (Methyltransf 2)	N	0	7	2897406	414	AN6945		O-methyltransferase, SAM-type methyltransferase, DNA binding domain
NCU02767	132.499	13.4977	-3.29519	134.72	38.8733	-1.79311	1	0	2300	NA	NA	1	0	Hyphal anastamosis-6 protein	ham-6	0	communication	none	N	3	1	9272188	144	AN5458
NCU02950	72.04	10.8201	-2.73508	73.2507	21.2653	-1.78434	1	0	NA	NA	NA	1	0	hypothetical protein	NA	WT	hypothetical	none	N	0	1	8608312	451	AN5204
NCU03600	2472.16	31.9885	-6.27207	2513.72	2210.11	-0.185709	1	0	NA	NA	NA	1	0	guanine triphosphate binding-5	NA	WT	development	none	N	0	5	1802295	280	AN9121		mutant fusion frequency = 70%±23%, not significantly different from WT (n=6, t-test).
NCU03978	3.00356	0.375808	-2.99861	3.05385	1.76433	-0.791508	1	0	NA	NA	NA	0	0	carboxylesterase	NA	noKO	metabolism	Carboxylesterase	Y	0	6	2315739	633	none		Common in mammalian liver, first part of many toxin-breakdown pathways, might be involved in plant cell wall degradation…
NCU04169	13.5339	2.88306	-2.23091	13.7615	34.0273	1.30605	1	0	NA	NA	NA	0	0	hypothetical protein	NA	WT	hypothetical with SP	none	Y	0	5	4920230	406	none
NCU04467	18.3699	4.01156	-2.19511	18.678	7.3193	-1.35157	1	0	NA	NA	NA	0	0	hypothetical protein	NA	WT	hypothetical with SP	none	Y	0	4	3260030	86	none
NCU04487	0.790055	0.077547	-3.34881	0.803309	0.29346	-1.45279	1	0	NA	NA	NA	0	0	hypothetical protein	NA	0.68	communication	none	N	1	4	3199564	302	none
NCU04542	163.489	23.9262	-2.77253	166.234	90.882	-0.871153	1	0	NA	NA	NA	0	0	hypothetical protein	NA	WT	hypothetical with SP+TM	none	Y	1	7	1503471	224	none
NCU04645	128.652	7.22168	-4.155	130.81	34.4166	-1.92629	1	0	NA	600	584	1	1	DUF124 domain-containing protein	NA	0	communication	Mitochondrial biogenesis AIM24	N	0	5	1350346	445	AN2993
NCU04732	211.814	8.90376	-4.57224	215.37	62.6426	-1.7816	1	0	NA	NA	NA	1	0	Hyphal anastamosis-11 protein	ham-11	0	communication	none	N	2	6	591010	633	none
NCU04872	94.6062	10.3249	-3.1958	96.193	26.0285	-1.88584	1	0	NA	1997	1852	0	0	hypothetical protein	NA	KOhet	hypothetical with SP+TM	none	Y	2	4	571135	387	none
NCU04910	48.8342	7.12317	-2.7773	49.6525	13.2835	-1.90223	1	0	NA	NA	23	0	0	hypothetical protein	NA	WT	metabolism	Methyltransferase (Methyltransf 23)	N	0	4	704681	365	none		Predicted to methylate guanine #1207 of the 16rRNA
NCU04928	3.59073	0.488832	-2.87687	3.651	1.15153	-1.66474	1	0	1506	NA	1780	1	1	hypothetical protein	NA	WT	hypothetical with TM	DUF3328	N	1	4	773885	270	AN7265
NCU05132	4.79617	0.6392	-2.90754	4.87672	1.55622	-1.64786	1	0	NA	NA	NA	0	0	hypothetical protein	NA	WT	metabolism	Glycosyl transferases group 1	N	13	6	3620207	2903	AN2955		polysaccaride synthesis
NCU05137	17.3814	2.85106	-2.60798	17.6736	8.03034	-1.13806	1	0	1887	NA	NA	1	0	non-anchored cell wall protein 1	NA	WT	fungal cell wall remodling	none	Y	0	6	3599193	691	TIR4 in S. cerevisiae		Tir4 is a cell wall mannoprotein expressed under anaerobic conditions and required for anaerobic growth
NCU05149	0.928911	0.0755576	-3.61989	0.944474	0.254562	-1.89149	1	0	NA	NA	NA	1	0	hypothetical protein	NA	WT	hypothetical with TM	none	N	3	6	3573081	363	none
NCU05648	10.5946	2.29274	-2.20819	10.7721	3.09628	-1.7987	1	0	1874	NA	2706	1	0	hypothetical protein	NA	WT	adehsion	none	N	0	6	1209876	981	T-box transcription factor TBX2 in N. discreta, hypothetical in other ascomycetes		BLASTp: Serine-rich adhesion for platelets, SraP is a Staphylococcus protein that mediates binding to human platelets nd virulence
NCU05822	6.33137	1.24624	-2.34494	6.4374	12.059	0.905558	1	0	NA	NA	66	0	0	hypothetical protein	NA	WT	signalling	Methyltransferase (Methyltransf 23)	N	0	7	3939651	375	none		Accoding to SMART: SCOP d1af7_2 domain = SAM-dependent chemotaxis receptor methyltransferase CheR, methylates the chemotaxis receptor
NCU05832	19.0193	3.7878	-2.32803	19.3381	6.57602	-1.55616	1	0	NA	NA	NA	0	0	hypothetical protein	NA	WT	metabolism	Methyltransferase (Methyltransf 23)	N	0	7	3977446	400	none		methyltransferase, synthesis of the herpes virus major outter-leaflet glycoprotein
NCU05836	93.7814	15.982	-2.55285	95.3572	25.9093	-1.87987	1	0	NA	562	531	1	1	glycosyl hydrolase family 47 protein	NA	0.13	communication	Glycosyl hydrolase family 47	N	1	7	3992761	612	MNL2 in S. cerevisiae		Likely alpha-1,2-mannosidase, Mnl2 is a putative mannosidase involved in protein degradation, localizes to ER
NCU05916	38.9567	7.56857	-2.36378	39.6115	12.671	-1.64438	1	0	NA	NA	NA	1	0	alpha-1,3-mannosyltransferase CMT1	NA	0.14	communication	Cryptococcal mannosyltransferase 1	Y	1	6	3480597	457	none		synthesis of the main polysaccharide in an "elaborate polysaccharide capsule" that is required for virulence in Cryptococcus
NCU05917	70.5029	11.643	-2.59822	71.6883	21.5589	-1.73346	1	0	NA	NA	NA	0	0	hypothetical protein	NA	noKO	hypothetical with SP	none	Y	0	6	3479341	287	none
NCU06130	75.4894	17.2233	-2.13191	76.7543	39.6527	-0.952831	1	0	NA	NA	NA	0	0	hypothetical protein	NA	WT	hypothetical with TM	none	N	4	7	1695981	244	none
NCU06419	166.546	38.2039	-2.12413	169.344	51.2777	-1.72355	1	0	2850	2813	2829	0	0	map kinase kinase	mek-1	0	communication	Pkinase	N	0	3	1333215	518	MKK1/MKK2 in S. cerevisiae		MAK-2 dependent phosphorylation (Jonkers et al 2014)
NCU06911	8.61098	0.790688	-3.445	8.75554	2.34979	-1.89767	1	0	NA	NA	1065	1	1	hypothetical protein	NA	WT	hypothetical with SP	none	Y	0	7	744988	187	none
NCU07191	84.5394	18.5644	-2.18708	85.9577	37.9934	-1.17788	1	0	NA	NA	2436	1	0	determinant of communication 1	doc-1	0.48	communication	none	N	0	5	6286497	828	none
NCU07235	2.74363	0.403882	-2.76408	2.78959	1.40531	-0.989171	1	0	NA	NA	NA	0	0	hypothetical protein	NA	WT	hypothetical with TM	DUF3176	N	4	5	6155250	650	none
NCU07432	69.6454	15.8407	-2.13639	70.8148	18.2539	-1.95584	1	0	836	753	796	1	1	tetraspanin	pls-1	KOhet	communication	none	N	4	1	644063	223	none		Membrane signaling complex involved in pathogenicity of ascomycetes on plants, works with NOX2 in Claviceps, interacts with NOXB in Podospora and Botrytis
NCU09295	48.2057	7.95578	-2.59913	49.0139	16.6828	-1.55483	1	0	428	NA	349	1	1	hypothetical protein	NA	WT	signalling	DUF3431(conserved "Nod-Like Recptor-C" motif)	N	1	7	43876	332	AN11033
NCU09596	7.96962	1.66526	-2.25876	8.10338	2.74773	-1.56029	1	0	NA	NA	2232	0	0	phytanoyl-CoA dioxygenase	NA	WT	redox	Phytanoyl-CoA dioxygenase (PhyH)	N	0	2	94846	336	AN0615		Lipid oxidation (PhyH is a human protein that alpha-oxidizes branched fatty acids inside the peroxisome)
NCU11308	48.5911	7.43664	-2.70797	49.4036	14.6969	-1.7491	1	0	1105	NA	1180	1	1	hypothetical protein	NA	WT	hypothetical with TM	none	N	2	7	3995244	108	none
NCU16364	4.96284	0.856507	-2.53463	5.04596	1.30071	-1.95583	1	0	318	NA	378	0	0	hypothetical protein	NA	noKO	hypothetical	none	N	0	1	2656743	172	none
NCU17044	1.69444	0.1514	-3.48437	1.72284	1.16909	-0.559409	1	0	NA	NA	NA	0	0	hypothetical protein	NA	noKO	hypothetical with TM	none	N	1	5	657738	202	STOP
